# Supplementary material for: Association between socioeconomic status and physical inactivity in a general Japanese population: NIPPON DATA2010
Source: PLOS journal article supplement (doi:10.1371/journal.pone.0254706), 2021-07-15
Supplement: S2 (10.1371/journal.pone.0254706.s002) [file journal.pone.0254706.s002]

**S2 Table.** Association between socioeconomic status and physical inactivity

|                                  | Men      |                |             |                        | Women      |                |             |                        |
|----------------------------------|----------|----------------|-------------|------------------------|------------|----------------|-------------|------------------------|
|                                  | <i>n</i> | % <sup>a</sup> | OR          | 95% CI                 | <i>n</i>   | % <sup>a</sup> | OR          | 95% CI                 |
| <b>Adult (20-59 years)</b>       |          |                |             |                        |            |                |             |                        |
| Employment status                |          |                |             |                        |            |                |             |                        |
| Working                          | 429      | 31.9           |             | (ref.)                 | 466        | 31.3           |             | (ref.)                 |
| Not working                      | 28       | 53.6           | <b>3.35</b> | ( <b>1.41 – 7.93</b> ) | <b>254</b> | <b>37.0</b>    | <b>1.44</b> | ( <b>1.02 – 2.02</b> ) |
| Educational attainment           |          |                |             |                        |            |                |             |                        |
| Junior high school               | 32       | 28.1           |             | (ref.)                 | 50         | 42.0           |             | (ref.)                 |
| High school                      | 205      | 26.3           | 0.92        | ( 0.38 – 2.24 )        | 298        | 31.9           | 0.73        | ( 0.38 – 1.43 )        |
| College or higher                | 220      | 40.5           | 1.88        | ( 0.76 – 4.61 )        | 372        | 33.3           | 0.78        | ( 0.40 – 1.52 )        |
| Living status                    |          |                |             |                        |            |                |             |                        |
| Living with spouse               | 330      | 33.3           |             | (ref.)                 | 547        | 30.2           |             | (ref.)                 |
| Not living with spouse           | 127      | 33.1           | 0.85        | ( 0.50 – 1.43 )        | 173        | 43.4           | <b>1.99</b> | ( <b>1.35 – 2.94</b> ) |
| Equivalent household expenditure |          |                |             |                        |            |                |             |                        |
| 1st tertile                      | 167      | 29.9           |             | (ref.)                 | 205        | 29.8           |             | (ref.)                 |
| 2nd tertile                      | 155      | 32.3           | 1.16        | ( 0.70 – 1.90 )        | 264        | 36.7           | 1.36        | ( 0.90 – 2.05 )        |
| 3rd tertile                      | 135      | 38.5           | 1.37        | ( 0.83 – 2.27 )        | 251        | 32.7           | 1.10        | ( 0.72 – 1.67 )        |
| <b>Elderly (60-89 years)</b>     |          |                |             |                        |            |                |             |                        |
| Employment status                |          |                |             |                        |            |                |             |                        |
| Working                          | 304      | 23.0           |             | (ref.)                 | 177        | 25.4           |             | (ref.)                 |
| Not working                      | 371      | 40.4           | <b>2.18</b> | ( <b>1.51 – 3.14</b> ) | 580        | 35.0           | <b>1.69</b> | ( <b>1.13 – 2.53</b> ) |
| Educational attainment           |          |                |             |                        |            |                |             |                        |
| Junior high school               | 247      | 31.6           |             | (ref.)                 | 288        | 32.6           |             | (ref.)                 |
| High school                      | 276      | 31.2           | 0.99        | ( 0.67 – 1.46 )        | 373        | 33.1           | 1.10        | ( 0.78 – 1.54 )        |
| College or higher                | 152      | 36.8           | 1.24        | ( 0.78 – 1.94 )        | 96         | 31.3           | 1.10        | ( 0.65 – 1.86 )        |
| Living status                    |          |                |             |                        |            |                |             |                        |
| Living with spouse               | 571      | 30.6           |             | (ref.)                 | 496        | 30.6           |             | (ref.)                 |
| Not living with spouse           | 104      | 43.3           | <b>1.65</b> | ( <b>1.04 – 2.60</b> ) | 261        | 36.8           | 1.32        | ( 0.92 – 1.88 )        |
| Equivalent household expenditure |          |                |             |                        |            |                |             |                        |
| 1st tertile                      | 193      | 27.5           |             | (ref.)                 | 248        | 33.5           |             | (ref.)                 |
| 2nd tertile                      | 252      | 35.7           | 1.43        | ( 0.94 – 2.19 )        | 262        | 31.3           | 0.82        | ( 0.56 – 1.21 )        |
| 3rd tertile                      | 230      | 33.5           | 1.28        | ( 0.82 – 2.00 )        | 247        | 33.6           | 0.97        | ( 0.65 – 1.43 )        |

OR, odds ratio; CI, confidence intervals. <sup>a</sup>Proportion of defined as participants who physical inactivity.

Physical activity index (PAI) was divided tertile by sex for each 10-year age category and the lowest tertile was defined as physical inactivity. Model was adjusted for all socioeconomic status and confounding factors (age, past histories, alcohol drinking habit, smoking habit, house ownership, body mass index and living with other), simultaneously.
